# Supplementary material
Source: HighWire-hosted journal article supplement (doi:10.1101/rna.071605.119)
Supplement: Supplemental_Figures_and_Tables.pdf [file Supplemental_Figures_and_Tables.pdf]

**Figure legends:**

**Fig.S1. The fractionation of His-tag-purified PIR-1 using FPLC.** The recombinant PIR-1 enriched with His-tag purification was further fractionated using FPLC, and the resulting fractions were visualized using a 12% denaturing protein PAGE gel.

**Fig.S2. The analyses of mRNA-seq. A) the distribution of reads:** each gene is divided into 100 fractions with mapped reads represented by the first nt position; the 'Y' axis represents the combined reads from all the genes mapped to each fraction; the 'X' axis represents each fraction of all the genes. **B) the comparison of gene expression:** each dot represents a gene with 'X' mapped reads in the sample prepared using nuclease P1 and 'Y' mapped reads prepared using alkali hydrolysis.

**Fig.S1**

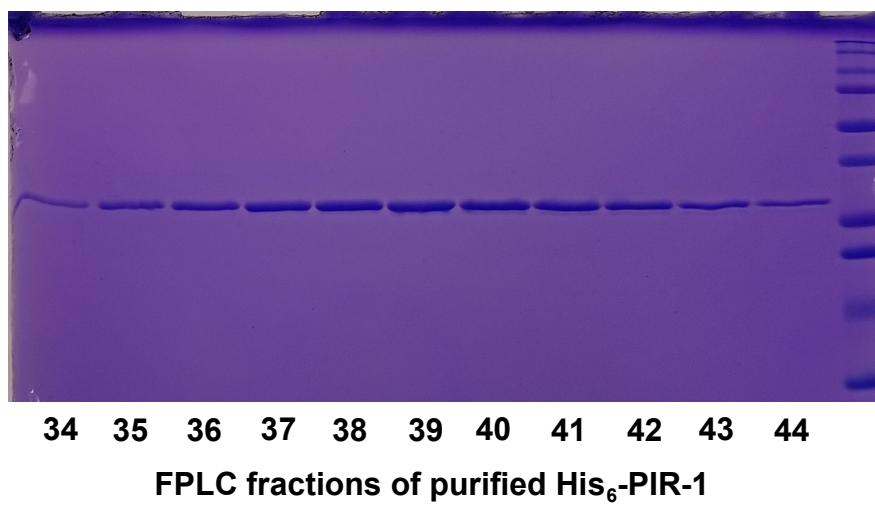

**Fig.S2**

**A: Distribution of reads**

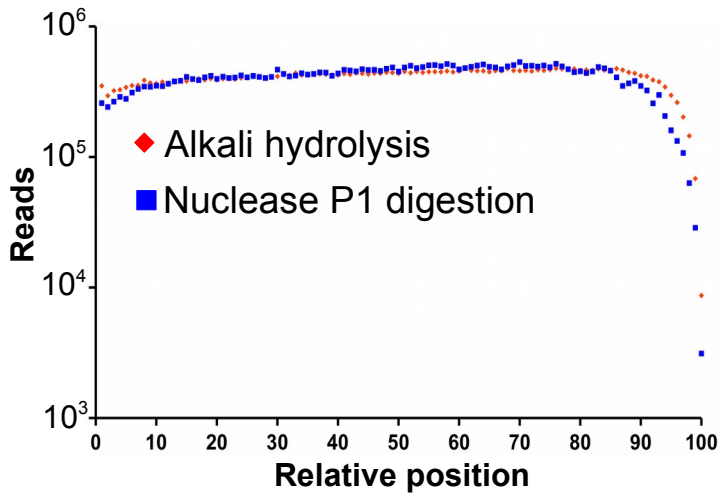

**B: Comparison of gene expression**

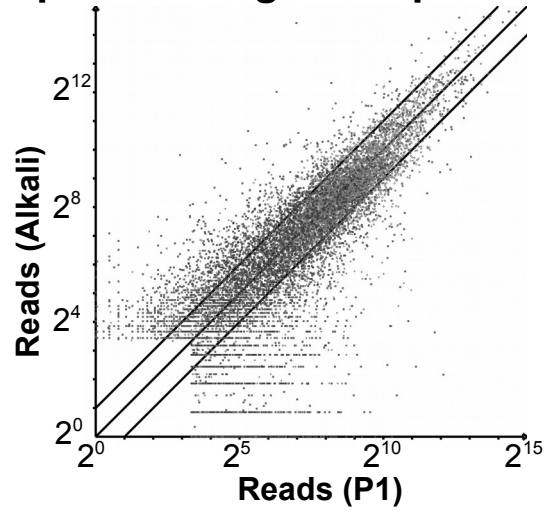

**Table S1: Linkers and Primers**

|                       |                                                |                                |
|-----------------------|------------------------------------------------|--------------------------------|
| <b>3' linker:</b>     | AppAGATCGGAAGAGCACACGTCTGAACTCCAGTCA/dideoxyC/ |                                |
| <b>5' linker:</b>     | ACACUCUUUCCCUACACGACGCUCUUCGGAUCU              |                                |
| <b>RT primer:</b>     | GTGACTGGAGTTCAGACGTGTGCTCTTCCGATCT             |                                |
| <b>5' PCR primer:</b> | AATGATACGGCGACCACCGAGATCTACACTCTTCCCTACACGA    |                                |
| <b>3' PCR primer:</b> | CAAGCAGAAGACGGCATAACGAGAT                      | ATCACGCA GTGACTGGAGTTCAGACGTGT |
|                       | CAAGCAGAAGACGGCATAACGAGAT                      | CGATGTCT GTGACTGGAGTTCAGACGTGT |
|                       | CAAGCAGAAGACGGCATAACGAGAT                      | TTAGGCGT GTGACTGGAGTTCAGACGTGT |
|                       | CAAGCAGAAGACGGCATAACGAGAT                      | TGACCACC GTGACTGGAGTTCAGACGTGT |
|                       | CAAGCAGAAGACGGCATAACGAGAT                      | ACAGTGCG GTGACTGGAGTTCAGACGTGT |
|                       | CAAGCAGAAGACGGCATAACGAGAT                      | GCCAATTT GTGACTGGAGTTCAGACGTGT |
|                       | CAAGCAGAAGACGGCATAACGAGAT                      | CAGATCCG GTGACTGGAGTTCAGACGTGT |
|                       | CAAGCAGAAGACGGCATAACGAGAT                      | ACTTGATG GTGACTGGAGTTCAGACGTGT |
|                       | CAAGCAGAAGACGGCATAACGAGAT                      | GATCAGTT GTGACTGGAGTTCAGACGTGT |
|                       | CAAGCAGAAGACGGCATAACGAGAT                      | TAGCTTTT GTGACTGGAGTTCAGACGTGT |
|                       | CAAGCAGAAGACGGCATAACGAGAT                      | GGCTACGG GTGACTGGAGTTCAGACGTGT |
|                       | CAAGCAGAAGACGGCATAACGAGAT                      | CTTGTAAT GTGACTGGAGTTCAGACGTGT |
|                       | CAAGCAGAAGACGGCATAACGAGAT                      | AGTCAAGT GTGACTGGAGTTCAGACGTGT |
|                       | CAAGCAGAAGACGGCATAACGAGAT                      | AGTTCCAC GTGACTGGAGTTCAGACGTGT |
|                       | CAAGCAGAAGACGGCATAACGAGAT                      | CCGTCCCA GTGACTGGAGTTCAGACGTGT |
|                       | CAAGCAGAAGACGGCATAACGAGAT                      | GTAGAGCA GTGACTGGAGTTCAGACGTGT |
|                       | CAAGCAGAAGACGGCATAACGAGAT                      | GTCCGCTC GTGACTGGAGTTCAGACGTGT |
|                       | CAAGCAGAAGACGGCATAACGAGAT                      | GTGAAACT GTGACTGGAGTTCAGACGTGT |
|                       | CAAGCAGAAGACGGCATAACGAGAT                      | GTGGCCGG GTGACTGGAGTTCAGACGTGT |
|                       | CAAGCAGAAGACGGCATAACGAGAT                      | GTTTCGCC GTGACTGGAGTTCAGACGTGT |
|                       | CAAGCAGAAGACGGCATAACGAGAT                      | CGTACGTA GTGACTGGAGTTCAGACGTGT |
|                       | CAAGCAGAAGACGGCATAACGAGAT                      | GAGTGGCG GTGACTGGAGTTCAGACGTGT |
|                       | CAAGCAGAAGACGGCATAACGAGAT                      | GGTAGCTA GTGACTGGAGTTCAGACGTGT |
|                       | CAAGCAGAAGACGGCATAACGAGAT                      | ATGAGCGA GTGACTGGAGTTCAGACGTGT |
|                       | CAAGCAGAAGACGGCATAACGAGAT                      | CAAAAGGC GTGACTGGAGTTCAGACGTGT |
|                       | CAAGCAGAAGACGGCATAACGAGAT                      | CAACTACC GTGACTGGAGTTCAGACGTGT |
|                       | CAAGCAGAAGACGGCATAACGAGAT                      | CACCGGAT GTGACTGGAGTTCAGACGTGT |
|                       | CAAGCAGAAGACGGCATAACGAGAT                      | CACTCATA GTGACTGGAGTTCAGACGTGT |
|                       | CAAGCAGAAGACGGCATAACGAGAT                      | CATTTTCG GTGACTGGAGTTCAGACGTGT |
|                       | CAAGCAGAAGACGGCATAACGAGAT                      | CCAACAGC GTGACTGGAGTTCAGACGTGT |
|                       | CAAGCAGAAGACGGCATAACGAGAT                      | CGGAATTC GTGACTGGAGTTCAGACGTGT |
|                       | CAAGCAGAAGACGGCATAACGAGAT                      | CTATACTC GTGACTGGAGTTCAGACGTGT |
|                       | CAAGCAGAAGACGGCATAACGAGAT                      | CTCAGAGG GTGACTGGAGTTCAGACGTGT |
|                       | CAAGCAGAAGACGGCATAACGAGAT                      | GACGACGA GTGACTGGAGTTCAGACGTGT |
|                       | CAAGCAGAAGACGGCATAACGAGAT                      | TAATCGTA GTGACTGGAGTTCAGACGTGT |
|                       | CAAGCAGAAGACGGCATAACGAGAT                      | TACAGCTA GTGACTGGAGTTCAGACGTGT |
|                       | CAAGCAGAAGACGGCATAACGAGAT                      | TATAATAG GTGACTGGAGTTCAGACGTGT |
|                       | CAAGCAGAAGACGGCATAACGAGAT                      | TCATTCTG GTGACTGGAGTTCAGACGTGT |
|                       | CAAGCAGAAGACGGCATAACGAGAT                      | TCCCGAAC GTGACTGGAGTTCAGACGTGT |
|                       | CAAGCAGAAGACGGCATAACGAGAT                      | TCGAAGCC GTGACTGGAGTTCAGACGTGT |
|                       | CAAGCAGAAGACGGCATAACGAGAT                      | TCGGCATG GTGACTGGAGTTCAGACGTGT |
|                       | CAAGCAGAAGACGGCATAACGAGAT                      | CTTCGGCC GTGACTGGAGTTCAGACGTGT |
|                       | CAAGCAGAAGACGGCATAACGAGAT                      | TTGTTACA GTGACTGGAGTTCAGACGTGT |
|                       | CAAGCAGAAGACGGCATAACGAGAT                      | AATCCAAT GTGACTGGAGTTCAGACGTGT |

CAAGCAGAAGACGGCATAACGAGAT **TCCTTTAA** GTGACTGGAGTTCAGACGTGT  
CAAGCAGAAGACGGCATAACGAGAT **GTACAATC** GTGACTGGAGTTCAGACGTGT  
CAAGCAGAAGACGGCATAACGAGAT **CCTGACTC** GTGACTGGAGTTCAGACGTGT  
CAAGCAGAAGACGGCATAACGAGAT **TAGCACAC** GTGACTGGAGTTCAGACGTGT  
CAAGCAGAAGACGGCATAACGAGAT **TCGGCGGG** GTGACTGGAGTTCAGACGTGT  
CAAGCAGAAGACGGCATAACGAGAT **TCAATTTT** GTGACTGGAGTTCAGACGTGT  
CAAGCAGAAGACGGCATAACGAGAT **GTAGGGAA** GTGACTGGAGTTCAGACGTGT  
CAAGCAGAAGACGGCATAACGAGAT **AAGGGTGG** GTGACTGGAGTTCAGACGTGT  
CAAGCAGAAGACGGCATAACGAGAT **ATAGTCTT** GTGACTGGAGTTCAGACGTGT  
CAAGCAGAAGACGGCATAACGAGAT **TGGAGGGG** GTGACTGGAGTTCAGACGTGT  
CAAGCAGAAGACGGCATAACGAGAT **TCAGGAAG** GTGACTGGAGTTCAGACGTGT  
CAAGCAGAAGACGGCATAACGAGAT **ACCACAAC** GTGACTGGAGTTCAGACGTGT  
CAAGCAGAAGACGGCATAACGAGAT **TTCAAGCC** GTGACTGGAGTTCAGACGTGT  
CAAGCAGAAGACGGCATAACGAGAT **TACTCAGA** GTGACTGGAGTTCAGACGTGT  
CAAGCAGAAGACGGCATAACGAGAT **TTCCTACT** GTGACTGGAGTTCAGACGTGT  
CAAGCAGAAGACGGCATAACGAGAT **TTATATGG** GTGACTGGAGTTCAGACGTGT  
CAAGCAGAAGACGGCATAACGAGAT **CCGTGACA** GTGACTGGAGTTCAGACGTGT  
CAAGCAGAAGACGGCATAACGAGAT **TAGCGCCA** GTGACTGGAGTTCAGACGTGT  
CAAGCAGAAGACGGCATAACGAGAT **CCTGGAGC** GTGACTGGAGTTCAGACGTGT  
CAAGCAGAAGACGGCATAACGAGAT **CCCGCAAT** GTGACTGGAGTTCAGACGTGT

---

**RNA in red; all oligos are written from 5' to 3'; blue are barcodes**

**Table S2: A simplified working protocol for RNA cloning**

**Note:**

**A. Each reaction is carried out in a single PCR tube with multiple steps by adding components sequentially to carry out different functionalities.**

**B. The final concentration of each component at an individual step is based on the accumulative (total) volume (number in red on line 1 of each table), including the volume of the previous step and the volume of the added components (starting from line 2 of each table).**

**Step 1: 3' ligation (0.1-1 µg total RNA or 0.1 µg small RNA <200nt)**

|                             | stock conc. | final conc. | 10 µl/Rx | 4 Rxs |
|-----------------------------|-------------|-------------|----------|-------|
| H2O/small RNA               |             |             | 3.25 µl  | 13 µl |
| Ligation buffer without ATP | 10 X        | 1 X         | 1 µl     | 4 µl  |
| PEG-8000                    | 50%         | 25%         | 5 µl     | 20 µl |
| 3' linker                   | 20 µM       | 0.5 µM      | 0.25 µl  | 1 µl  |
| Truncated T4 RNA ligase 2   | 20 µM       | 0.5 µM      | 0.25 µl  | 1 µl  |
| PIR-1 (optional)            | 10 µM       | 0.25 µM     | 0.25 µl  | 1 µl  |

Mix thoroughly by pipetting 20 times and incubate at room temperature for 2 hrs

The volume of each reaction is 10 µl.

**Step 2: annealing**

Inactivate at 65 °C for 10 mins, add 0.5 µl of 10 µM RT primer and anneal at 65 °C for 5 mins

Cool to room temperature by 0.1 °C/s

The volume of each reaction is 10.5 µl due to the addition of the RT primer.

**Step 3: 5' ligation**

|                  | stock conc. | final conc. | 20 µl/Rx | 4 Rxs   |
|------------------|-------------|-------------|----------|---------|
| H2O              |             |             | 8.1 µl   | 32.4 µl |
| ATP              | 20 mM       | 0.5 mM      | 0.5 µl   | 2 µl    |
| 5' linker        | 20 µM       | 0.4 µM      | 0.4 µl   | 1.6 µl  |
| T4 RNA ligase 1  | 20 µM       | 0.25 µM     | 0.25 µl  | 1 µl    |
| hDCP2 (optional) | 20 µM       | 0.25 µM     | 0.25 µl  | 1 µl    |

Add 9.5 µl of the mixture to each reaction, and incubate at room temp. for 2 hrs

The volume of each reaction is 20 µl including 10.5 µl from the previous step.

**Step 4: Reverse transcription (RT)**

|                    | stock conc. | final conc. | 24.25 µl/Rx | 4 Rxs   |
|--------------------|-------------|-------------|-------------|---------|
| dNTP               | 10 mM       | 0.41 mM     | 0.99 µl     | 3.98 µl |
| RT dilution buffer | 12 X        | 1 X         | 2.02 µl     | 8.08 µl |
| DTT                | 100 mM      | 4 mM        | 0.97 µl     | 3.88 µl |
| SSII               | 20 µM       | 0.21 µM     | 0.25 µl     | 1.02 µl |

Add 4.25 µl of the mixture to each reaction, and incubate at 42 °C 30 mins & 85 °C 5mins

The volume of each reaction is 24.25 µl including 20 µl from the previous step.

**Step 5: PCR**

|            | stock   | final  | 50 µl/Rx | 4 Rxs  |
|------------|---------|--------|----------|--------|
| H2O        |         |        | 37.25 µl | 149 µl |
| PFU buffer | 10 X    | 1 X    | 5 µl     | 20 µl  |
| TMAC       | 1000 mM | 15 mM  | 0.75 µl  | 3 µl   |
| dNTP       | 10 mM   | 0.1 mM | 0.5 µl   | 2 µl   |

|                              |                             |                              |                              |                             |
|------------------------------|-----------------------------|------------------------------|------------------------------|-----------------------------|
| <b>5' PCR primer</b>         | 10 $\mu$ M                  | 0.1 $\mu$ M                  | <b>0.5 <math>\mu</math>l</b> | <b>2 <math>\mu</math>l</b>  |
| <b>Indexed 3' PCR primer</b> | <b>10 <math>\mu</math>M</b> | <b>0.1 <math>\mu</math>M</b> | <b>0.5 <math>\mu</math>l</b> | <b>2 <math>\mu</math>l</b>  |
| <b>The above cDNA</b>        | 10 X                        | 1 X                          | <b>5 <math>\mu</math>l</b>   | <b>20 <math>\mu</math>l</b> |
| <b>PFU</b>                   | 100 X                       | 1 X                          | <b>0.5 <math>\mu</math>l</b> | <b>2 <math>\mu</math>l</b>  |

**1 cycle** 94 °C 1min  
**5 cycles** 94 °C 20s; 53 °C 20s; 68 °C 40s  
**11 cycles** 94 °C 20s; 68 °C 40s  
 4 °C forever

**The volume of each reaction is 50  $\mu$ l.**

**Add 3  $\mu$ l each of 5' and indexed 3' PCR primer of 10  $\mu$ M**

**2 cycles** 94 °C 20s; 68 °C 40s  
 4 °C forever

**The volume of each reaction is 56  $\mu$ l including the additional primers.**

Indexed PCR products were compared visually using a 8% native PAGE gel, pooled according to a custom-specified ratio, phenol-extracted, precipitated and gel-purified as one sample.

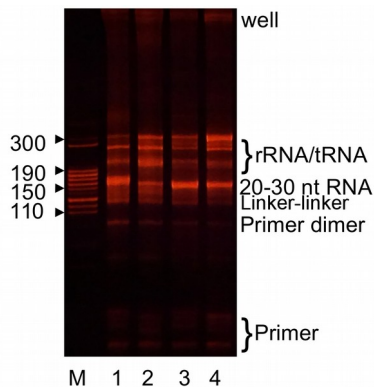

M: 10 bp marker (110-200, 260 and 300)  
 1: 0.5  $\mu$ g mouse testis total RNA  
 2: 0.4  $\mu$ g mouse ovary total RNA  
 3: 0.5  $\mu$ g *C. elegans* small RNA (<200 nt)  
 4: 1  $\mu$ g *C. elegans* total RNA

#### Buffers

##### 10 X ligation buffer without ATP:

0.5 M Tris pH7.5, 0.1 M MgCl<sub>2</sub>, 0.1 M DTT

##### 12 X RT dilution buffer:

250 mM Tris pH 8.8, 0.75 M KCl

#### Enzymes:

T4 RNA ligase 1 ((homemade)  
 Truncated T4 RNA ligase 2 (homemade)  
 Superscript II (SSII) from Invitrogen or homemade  
 PFU (commercial or homemade)  
 PIR-1 (homemade)  
 hDCP2 (homemade)  
 TMAC (Tetramethylammonium chloride, Sigma)

**The theoretical size of a cDNA containing a 22-nt RNA insert is 146 bps. However, the apparent size on a PAGE gel may appear as 140-160 bps due to the sequence heterogeneity.**
